# Supplementary material
Source: publisher site journal article supplement (https://www.spandidos-publications.com/1638/downloadSupplementary)
Supplement: Supplementary file 1 [file downloadSupplementary]

## Sheet: Table S2. LBH normalized expres
Table SII. Normalized LBH expression levels. LBH, limb-bud and heart; TCGA, The Cancer Genome Atlas.
	TCGA-CG-5733-11	TCGA-CG-5734-11	TCGA-HU-A4GN-11	TCGA-FP-7829-11	TCGA-CG-5721-11	TCGA-HU-A4GH-11	TCGA-BR-7704-11	TCGA-HU-8238-11	TCGA-BR-7851-11	TCGA-CG-5730-11	TCGA-BR-7703-11	TCGA-CG-5728-11	TCGA-CG-5722-11	TCGA-CG-4469-01	TCGA-VQ-A91Z-01	TCGA-RD-A7BT-01	TCGA-D7-6822-01	TCGA-RD-A8N6-01	TCGA-CG-4438-01	TCGA-HU-8244-01	TCGA-HU-A4GF-01	TCGA-VQ-A925-01	TCGA-VQ-A91S-01	TCGA-VQ-A8PF-01	TCGA-VQ-A91Y-01	TCGA-D7-A6EX-01	TCGA-ZQ-A9CR-01	TCGA-VQ-A91Q-01	TCGA-CG-4441-01	TCGA-BR-8680-01	TCGA-BR-8686-01	TCGA-CD-8529-01	TCGA-HF-A5NB-01	TCGA-D7-A6F2-01	TCGA-HU-8249-01	TCGA-VQ-A8E3-01	TCGA-HU-A4GD-01	TCGA-F1-A72C-01	TCGA-CG-5734-01	TCGA-VQ-A8P5-01	TCGA-BR-8077-01	TCGA-VQ-A92D-01	TCGA-CG-4436-01	TCGA-BR-4294-01	TCGA-R5-A7ZF-01	TCGA-VQ-AA6G-01	TCGA-RD-A8MV-01	TCGA-VQ-AA68-01	TCGA-FP-7829-01
LBH	3.5867	2.16382	2.6264	4.46851	3.01582	3.88613	3.14474	1.90147	2.64143	2.43651	2.96744	4.32049	3.33609	3.00634	2.70731	2.29513	2.47886	4.4049	3.92992	0.921598	3.14971	4.18821	4.5275	3.99336	4.75702	5.07841	4.24924	4.19968	4.16061	3.02206	3.91404	4.61144	2.25927	3.19543	3.00914	2.84058	1.83732	3.8277	3.29097	3.91778	3.73263	3.30054	1.97496	2.45777	4.10251	2.61017	3.46802	3.41093	3.26306
[truncated: 127 more columns]
